# Supplementary material
Source: MDPI journal article supplement (https://www.mdpi.com/2073-4441/13/9/1216)
Supplement: s1 [file s1]

Supplementary Materials

# Changes in the Soil–Plant–Water System Due to Biochar Amendment

Ágota Horel \* and Eszter Tóth

**Table S1.** Pearson correlation analysis ( $r$ ) and  $p$ -value ( $p$ ) between the investigated plant parameters for both investigated years (2017 and 2018) separately and together. C represents control, BC the biochar amended treatments, 17 and 18 are the years of 2017 and 2018, respectively. Correlation is significant at the  $p < 0.05$  level.

| $r \backslash p$ | Height<br>C | Height<br>BC | Height<br>C17 | Height<br>BC17 | Height<br>C18 | Height<br>BC18 | Crop<br>C | Crop<br>BC | Crop<br>C17 | Crop<br>BC17 | Crop<br>C18 | Crop<br>BC18 | Root<br>C | Root<br>BC | Root<br>C17 | Root<br>BC17 | Root<br>C18 | Root<br>BC18 | Leaf<br>C | Leaf<br>BC | Stem<br>C | Stem<br>BC | Tassel<br>C | Tassel<br>BC |
|------------------|-------------|--------------|---------------|----------------|---------------|----------------|-----------|------------|-------------|--------------|-------------|--------------|-----------|------------|-------------|--------------|-------------|--------------|-----------|------------|-----------|------------|-------------|--------------|
| HeightC          |             | 0.78         | 1.00          | -0.02          | -0.20         | -0.17          | 0.45      | 0.57       | 0.05        | -0.02        | 0.06        | -0.20        | 0.43      | -0.06      | 0.13        | -0.10        | -0.06       | 0.40         | -0.29     | 0.12       | 0.62      | 0.61       | 0.62        | 0.10         |
| HeightBC         | 0.000       |              | -0.19         | 1.00           | -0.28         | -0.06          | 0.42      | 0.55       | 0.07        | 0.20         | -0.06       | -0.27        | 0.37      | -0.11      | 0.04        | -0.15        | 0.23        | 0.50         | 0.89      | 0.43       | -0.49     | -0.41      | -0.07       | 0.74         |
| HeightC17        | 0.000       | 0.214        |               | -0.19          | 0.08          | 0.05           | -0.07     | 0.01       | 0.05        | -0.02        | 0.01        | -0.15        | 0.18      | 0.24       | 0.18        | 0.24         | -0.06       | -0.29        | -0.29     | 0.12       | 0.62      | 0.61       | 0.62        | 0.10         |
| HeightBC17       | 0.899       | 0.000        | 0.214         |                | -0.16         | 0.01           | 0.26      | 0.35       | 0.07        | 0.20         | -0.03       | -0.27        | 0.04      | 0.03       | 0.04        | 0.03         | 0.23        | 0.16         | 0.89      | 0.43       | -0.49     | -0.41      | -0.07       | 0.74         |
| HeightC18        | 0.143       | 0.036        | 0.608         | 0.297          |               | -0.15          | -0.10     | -0.24      | 0.09        | 0.03         | -0.12       | 0.04         | 0.00      | 0.05       | 0.08        | 0.06         | -0.10       | -0.16        | 0.59      | -0.47      | 0.15      | 0.29       | 0.64        | -0.04        |
| HeightBC18       | 0.250       | 0.675        | 0.760         | 0.950          | 0.299         |                | -0.22     | 0.06       | -0.10       | 0.25         | -0.31       | 0.08         | -0.01     | -0.05      | -0.02       | -0.05        | -0.10       | -0.12        | -0.68     | -0.41      | 0.27      | 0.34       | -0.44       | -0.56        |
| FruitC           | 0.000       | 0.000        | 0.657         | 0.074          | 0.463         | 0.131          |           | 0.44       | 1.00        | 0.28         | 0.05        | -0.10        | 0.23      | -0.14      | -0.15       | -0.19        | 0.02        | 0.13         | -0.04     | -0.66      | -0.83     | -0.76      | -0.58       | -0.19        |
| FruitBC          | 0.000       | 0.000        | 0.943         | 0.014          | 0.075         | 0.685          | 0.000     |            | 0.29        | 1.00         | 0.05        | -0.02        | 0.38      | -0.20      | 0.21        | -0.09        | 0.27        | 0.53         | -0.11     | -0.84      | -0.53     | -0.41      | -0.40       | -0.33        |
| FruitC17         | 0.737       | 0.677        | 0.737         | 0.677          | 0.565         | 0.525          | 0.000     | 0.069      |             | 0.29         | -0.08       | 0.09         | -0.20     | 0.06       | -0.20       | 0.06         | -0.25       | -0.17        | -0.04     | -0.66      | -0.83     | -0.76      | -0.58       | -0.19        |
| FruitBC17        | 0.896       | 0.206        | 0.896         | 0.206          | 0.848         | 0.112          | 0.073     | 0.000      | 0.069       |              | -0.03       | 0.14         | 0.15      | 0.17       | 0.15        | 0.17         | 0.06        | 0.29         | -0.11     | -0.84      | -0.53     | -0.41      | -0.40       | -0.33        |
| FruitC18         | 0.659       | 0.664        | 0.933         | 0.839          | 0.391         | 0.031          | 0.712     | 0.704      | 0.613       | 0.856        |             | 0.18         | 0.19      | 0.05       | 0.22        | 0.06         | 0.24        | 0.02         | -0.31     | 0.80       | 0.66      | 0.65       | -0.01       | 0.19         |
| FruitBC18        | 0.191       | 0.072        | 0.324         | 0.072          | 0.781         | 0.595          | 0.492     | 0.889      | 0.595       | 0.383        | 0.222       |              | 0.00      | -0.19      | 0.00        | -0.19        | 0.04        | -0.26        | -0.36     | -0.01      | 0.02      | 0.03       | -0.50       | -0.58        |
| RootC            | 0.000       | 0.000        | 0.233         | 0.794          | 0.980         | 0.931          | 0.031     | 0.000      | 0.224       | 0.339        | 0.176       | 0.994        |           | 0.15       | 1.00        | -0.13        | 0.20        | 0.15         | 0.41      | -0.13      | 0.53      | 0.22       | 0.72        | 0.31         |
| RootBC           | 0.524       | 0.282        | 0.119         | 0.849          | 0.719         | 0.753          | 0.179     | 0.067      | 0.711       | 0.270        | 0.716       | 0.196        | 0.165     |            | -0.11       | 1.00         | -0.06       | -0.26        | -0.12     | 0.76       | 0.68      | 0.92       | -0.11       | 0.24         |
| RootC17          | 0.385       | 0.799        | 0.233         | 0.799          | 0.583         | 0.900          | 0.329     | 0.171      | 0.224       | 0.339        | 0.145       | 0.994        | 0.000     | 0.469      |             | -0.11        | 0.20        | 0.20         | 0.41      | -0.13      | 0.53      | 0.22       | 0.72        | 0.31         |
| RootBC17         | 0.487       | 0.274        | 0.119         | 0.849          | 0.676         | 0.753          | 0.175     | 0.520      | 0.711       | 0.270        | 0.665       | 0.196        | 0.366     | 0.000      | 0.469       |              | -0.06       | -0.23        | -0.12     | 0.76       | 0.68      | 0.92       | -0.11       | 0.24         |
| RootC18          | 0.672       | 0.124        | 0.672         | 0.124          | 0.513         | 0.531          | 0.919     | 0.075      | 0.123       | 0.714        | 0.113       | 0.804        | 0.185     | 0.699      | 0.185       | 0.699        |             | 0.25         | -0.13     | 0.03       | -0.34     | 0.02       | -0.19       | -0.20        |

---

|          |       |       |       |       |       |       |       |       |       |       |       |       |       |       |       |       |       |       |       |       |       |       |       |       |
|----------|-------|-------|-------|-------|-------|-------|-------|-------|-------|-------|-------|-------|-------|-------|-------|-------|-------|-------|-------|-------|-------|-------|-------|-------|
| RootBC18 | 0.001 | 0.000 | 0.056 | 0.271 | 0.250 | 0.412 | 0.289 | 0.000 | 0.284 | 0.063 | 0.867 | 0.084 | 0.222 | 0.037 | 0.173 | 0.094 | 0.091 |       | 0.67  | -0.03 | -0.55 | -0.40 | 0.17  | 0.37  |
| LeafC    | 0.576 | 0.018 | 0.576 | 0.018 | 0.216 | 0.139 | 0.937 | 0.835 | 0.937 | 0.835 | 0.549 | 0.478 | 0.422 | 0.821 | 0.422 | 0.821 | 0.803 | 0.143 |       | 0.44  | -0.19 | -0.32 | 0.48  | 0.90  |
| LeafBC   | 0.804 | 0.334 | 0.804 | 0.334 | 0.292 | 0.361 | 0.103 | 0.017 | 0.103 | 0.017 | 0.032 | 0.975 | 0.783 | 0.048 | 0.783 | 0.048 | 0.954 | 0.952 | 0.385 |       | 0.66  | 0.52  | 0.26  | 0.64  |
| StemC    | 0.194 | 0.329 | 0.194 | 0.329 | 0.783 | 0.609 | 0.043 | 0.275 | 0.043 | 0.275 | 0.152 | 0.972 | 0.281 | 0.137 | 0.281 | 0.137 | 0.510 | 0.261 | 0.714 | 0.156 |       | 0.88  | 0.58  | 0.12  |
| StemBC   | 0.201 | 0.417 | 0.201 | 0.417 | 0.571 | 0.507 | 0.077 | 0.417 | 0.077 | 0.417 | 0.162 | 0.951 | 0.668 | 0.009 | 0.668 | 0.009 | 0.966 | 0.431 | 0.534 | 0.290 | 0.022 |       | 0.53  | -0.09 |
| TasselC  | 0.101 | 0.864 | 0.101 | 0.864 | 0.086 | 0.279 | 0.134 | 0.327 | 0.134 | 0.327 | 0.977 | 0.204 | 0.044 | 0.791 | 0.044 | 0.791 | 0.658 | 0.682 | 0.339 | 0.577 | 0.228 | 0.284 |       | 0.53  |
| TasselBC | 0.826 | 0.058 | 0.826 | 0.058 | 0.934 | 0.187 | 0.688 | 0.467 | 0.688 | 0.467 | 0.681 | 0.177 | 0.499 | 0.602 | 0.499 | 0.602 | 0.660 | 0.417 | 0.015 | 0.125 | 0.825 | 0.858 | 0.224 |       |

---
